# Modeling collaterally sensitive drug cycles: shaping heterogeneity to allow adaptive therapy

Nara Yoon, Nikhil Krishnan, Jacob Scott

July 13, 2020

## Abstract

In previous work, we focused on the optimal therapeutic strategy with a pair of drugs which are collaterally sensitive to each other, that is, a situation in which evolution of resistance to one drug induces sensitivity to the other, and vice versa. [1] Here, we have extended this exploration to the optimal strategy with a collaterally sensitive drug sequence of an arbitrary length,  $N(\geq 2)$ . To explore this, we have developed a dynamical model of sequential drug therapies with  $N$  drugs. In this model, tumor cells are classified as one of  $N$  subpopulations represented as  $\{R_i | i = 1, 2, \dots, N\}$ . Each subpopulation,  $R_i$ , is resistant to 'Drug  $i$ ' and each subpopulation,  $R_{i-1}$  (or  $R_N$ , if  $i = 1$ ), is sensitive to it, so that  $R_i$  increases under 'Drug  $i$ ' as it is resistant to it, and after drug-switching, decreases under 'Drug  $i + 1$ ' as it is sensitive to that drug(s).

Similar to our previous work examining optimal therapy with two drugs, we found that there is an initial period of time in which the tumor is 'shaped' into a specific makeup of each subpopulation, at which time all the drugs are equally effective ( $\mathcal{R}^*$ ). After this shaping period, all the drugs are quickly switched with duration relative to their efficacy in order to maintain each subpopulation, consistent with the ideas underlying adaptive therapy. [2, 3]

Additionally, we have developed methodologies to administer the optimal regimen under clinical or experimental situations in which no drug parameters and limited information of trackable populations data (all the subpopulations or only total population) are known. The therapy simulation based on these methodologies showed consistency with the theoretical effect of optimal therapy.

## 1 Introduction

Despite the development of a large pharmacopoeia of novel anti-cancer drugs, curative treatments remain elusive after systematic, or metastatic, spread of cancer. The evolution of resistance to initially effective therapies is one of the primary forces behind this phenomenon. This evolution is a complex phenomenon influenced by a variety of factors and their interactions [4, 5, 6], including genetic mutation and changed frequency of gene expression [7, 8, 9], drug efflux pumps on the cell membrane [10, 11], tumor microenvironment [12] and so on. Despite the difficulty of elucidating these complicated mechanisms, a multitude

31 of (epi)genetic factors may converge to evolve finite phenotypes. Resistance to a particular  
32 drug can represent each of these phenotypes. Furthermore, such diversity in resistance phe-  
33 notype can be leveraged to find synergistic combinations in which resistance and sensitivity  
34 factors of the involved drugs are properly engaged, like multiple cogwheels rolling together.  
35 Drugs having such relationships are called collaterally sensitive drugs or negatively cross  
36 resistant drugs. Particularly, there is utility in a drug sequence which completes a cycle of  
37 such relationships. (e.g., the three drugs connected by the red arrows in Figure 1.) With  
38 such cycles, one could, in theory, generate infinitely long drug sequences which can be used  
39 in long term therapy to mitigate the evolution of resistance in a tumor. [13] In light of this,  
40 we extend our previous work on two-drug cycles [1] to arbitrary length cycles in this paper.

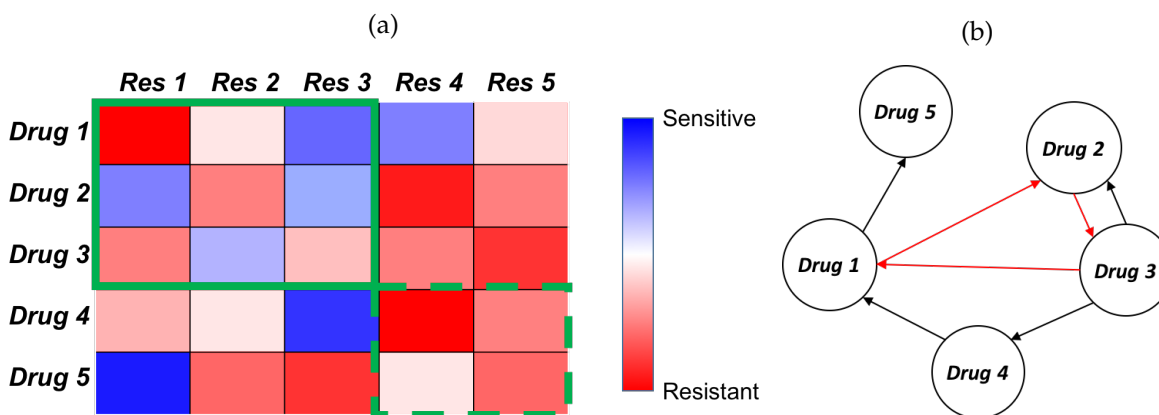

Figure 1: A hypothetical collateral sensitivity map (CSM), and associated collateral sensitivity network (CSN) among 5 drugs. (a) A collateral sensitivity map: This map represents the results of a hypothetical experiment in which tumors are exposed to one drug (row), and after resistance to this drug develops are tested against another drug (column). The color is then the *change* in sensitivity from the wild type to the evolved strain. (b) A collateral sensitivity network showing every drug pair and their collateral sensitivity relationship. Nodes represent drugs, and directed edges point from drugs, which when resistance develops, end with sensitivity to another (edge terminus). The four drugs connected by the red arrows is an example of collaterally sensitive drug cycle.

41 Tumors consists of diverse cells in terms of cellular traits (heterogeneity in genotypes  
42 and phenotypes) and/or surrounding environment (affinity to blood vessels, fibroblasts,  
43 etc.) which has been comprehensively reviewed. [14] This heterogeneity has been captured  
44 in numerous ways mathematically using a variety of different formalisms [15]. One type of  
45 simple model germane to the work here represents dimensionless fractions of finite number  
46 of cell subpopulations, assuming their total population is fixed. Tracking of the frequency  
47 of subpopulations has been efficiently used to explore the dynamics of tumors and therapy  
48 in the setting of evolutionary game theory [16, 17, 18, 19]. Other models described the  
49 population dynamics of also finitely many cell types [20, 21, 22], that can simulate the  
50 dynamical behavior of both subpopulations and total populations of cancers.

51 Some other modeling work has incorporated more detailed heterogeneous framework,  
52 by introducing continuously changing cellular biology [23, 24] or stromal microenvironment  
53 environment [25, 26]. In this paper, we chose to account for the intermediate level of mod-

54 eling complexity. Using constrained ODEs, as in EGT, but also considering differential drug  
55 effect, similar to the concept of fitness landscapes [27]. With that, we defined a drug efficacy  
56 measure based on cell population, and explored the effects of collaterally sensitive drug  
57 schedules.

58 For parsimony and analytical tractability, we assume that there are possibly three fitness  
59 levels under each drug: lowest (for most sensitive cells), highest (for most resistant cells)  
60 and intermediate (for other neutral cells). Mutations in this population structure result only  
61 in progressively higher fitness values, specifically from sensitive to neutral and neutral to  
62 resistant types. We make no fine grained biological assumptions for the purposes of this  
63 work, but assume only that a fitness metric of overall proliferation ability in the process  
64 of convergent evolution [28, 29, 30, 31]. A subpopulation having a same fitness value is  
65 assumed to be homogeneous in terms of how it responds to drug exposure. And, while it has  
66 been shown that fitness can often change as a function of drug dose, so called seascares [32],  
67 and that this can be useful for control, we do not consider that possibility here [33].

68 In this study we ask the following questions: Given knowledge of the evolutionary pat-  
69 terns of resistance, what is the optimal method of using a large panel of drugs? What can we  
70 learn about the evolution of resistance from observing patient outcomes? Can each patient  
71 be their own control?

72 The remainder of this manuscript is structured as follows. The details of our model are  
73 described in Section 2. Based on the model, we derive the optimal treatment strategy and  
74 a practical method of its implementation, which are discussed in Section 3 and Section 4  
75 respectively. Our finding of optimal treatment is consistent with the concept of ‘minimum  
76 effective dosage’ in the adaptive therapy paradigm, which optimizes drug effectiveness with  
77 the least risk of drug resistance development [2]. Section 5 includes a discussion of adaptive  
78 therapy, as well as overall conclusions and discussions of this work.

## 79 2 Modeling for collaterally sensitive drug cycles

80 Based on our previous model of collateral sensitivity cycles in two drugs [1], we have de-  
81 veloped an extended model for an arbitrary length of  $N$  drugs cycles, *Drug 1*, *Drug 2*, ...,  
82 and *Drug N*. In the model, tumor cells are classified into  $N$  subpopulations,  $R_1, R_2, \dots$ , and  
83  $R_N$ . Each subpopulation,  $R_i$  is resistant under *Drug i*, sensitive under *Drug i'* (see Table  
84 1 for the definition of  $i'$ ), and neutral under any of other drugs. Therefore, we can simu-  
85 late the patterns of collateral sensitivity sequences in terms of the resistant cell populations  
86 (for example,  $R_{i'}$ ) under a particular drug (i.e., *Drug i'* in the example) which subsequently  
87 declines under the next drug in the cycle to which it is sensitive (i.e., *Drug i*).

88 Under each drug (*Drug i*), we assigned three types of total proliferation rates (“birth  
89 rate”-“death rate”), for resistant ( $p_r^i > 0$ ), sensitive ( $p_s^i < 0$ ) and neutral ( $p_0^i \in (p_s^i, p_r^i)$ )  
90 cells. Assuming evolution of each cellular type occurs toward higher fitness levels (i.e.,  
91 proliferation rates in our model), we accounted for two kinds of transitions: from sensitive  
92 to neutral types ( $g_s^i > 0$ ) and neutral to resistant types ( $g_0^i > 0$ ). The dynamics of  $R_1, R_2, \dots$ ,  
93 and  $R_N$  under any chosen drug, *Drug i*, are described in Figure 2.

94 In our study, system (1) is used to describe the dynamics of cell populations under a  
95 single drug. To study the dynamics under multiple drugs switched over time, we switch the

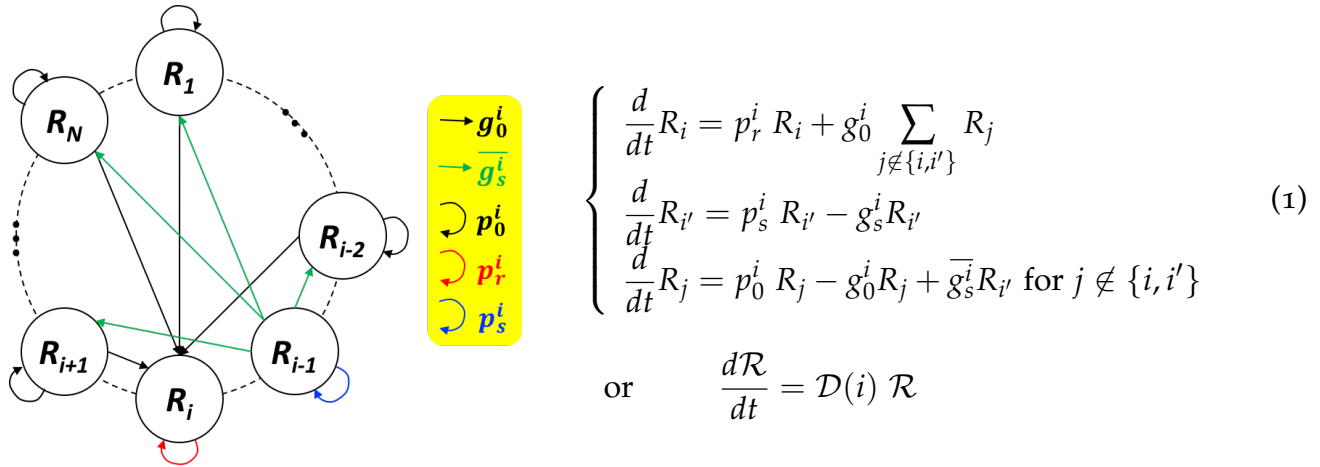

Figure 2: **Population dynamics under Drug  $i$  therapy**, where  $R_i$  and  $R_{i-1}$  ( $i-1 = i' \geq 1$ ) are resistant and sensitive cell populations respectively, with all the other compartments being populations of neutral type. The left panel shows the schematic of transitions/turnovers among  $R_j$ s, and the right panel shows the associated system of differential equations. Here,  $\{p_r^i, p_s^i, p_0^i\}$  are proliferation rate of resistant, sensitive, and neutral cells,  $\{g_s^i$  (and corresponding  $\bar{g}_s^i = g_s^i / (N-2)$ ),  $g_0^i\}$  are transition rates from sensitive to neutral and, from neutral to resistant types.

96 drug index,  $i$ , in the system accordingly. The resulting piece-wise continuous differential  
 97 system will describe the effect of this drug switch strategy. An example of population  
 98 histories with 4 collaterally sensitive drugs switched as indicated is shown in Figure 3.

99 Rapid drug rotation with chosen intensities of the  $N$  drugs (i.e.,  $f_i \Delta t$ -long with Drug  $i$   
 100 where  $\sum_{i=1}^N f_i = 1$  and  $\Delta t \rightarrow 0^+$ ) is employed in our optimal therapeutic strategy. This will  
 101 be described in detail in the next section. In our modeling framework, the fast switch is  
 102 highly related to the therapy with a drug mixture, since its corresponding cell population  
 103 model is in a similar form as the single drug dynamics (Equation (1)). The only difference  
 104 is the transition matrix which is replaced by the linear combination of the matrices of all the  
 105 drugs ( $\mathcal{D}(k)$ s) with the relative intensities ( $f_k$ s), as described below.

$$\frac{d\mathcal{R}}{dt} = \sum_{i=1}^N f_i \mathcal{D}(i) \mathcal{R} \quad (2)$$

106 For the derivation of the Equation (2), see Theorem A.6 in Appendix A.

## 107 3 Optimal therapeutic schedule

### 108 3.1 Description of the optimal population dynamics

109 Analysis of a system comprised by multiple systems of (1) with different values of  $i$ ,  $p^i$ s and  
 110  $g^i$ s, is limited due to the complexity of the system. Instead, we studied it numerically to find

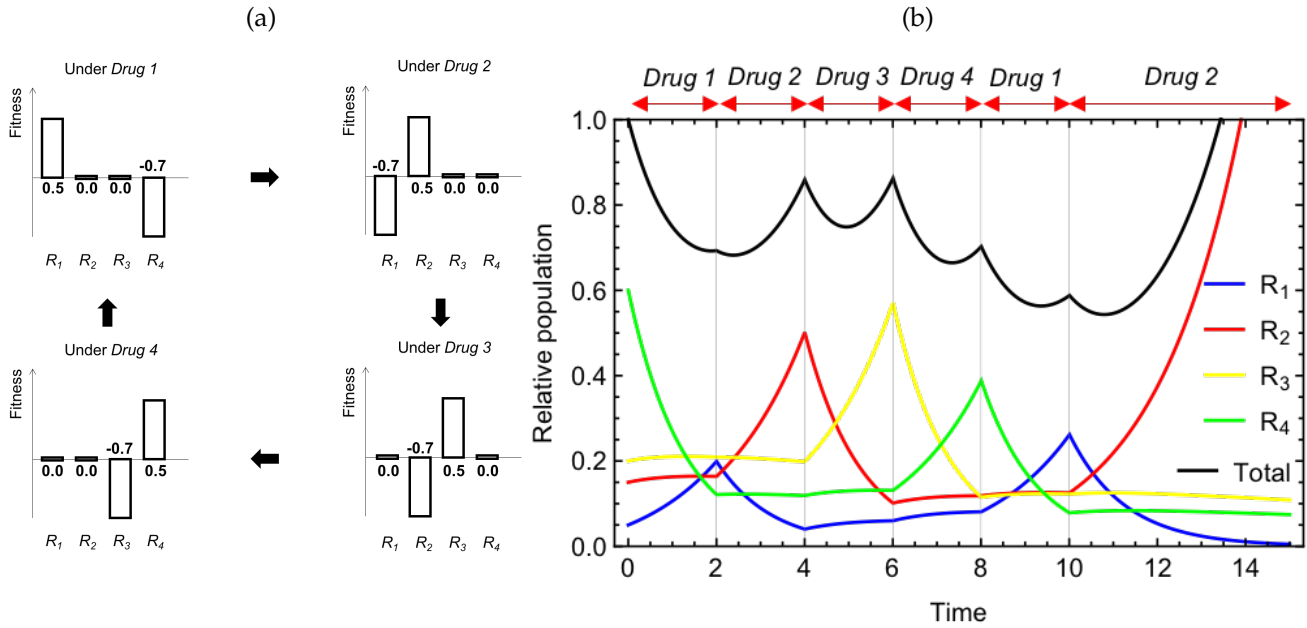

**Figure 3: Example simulation with hypothetical drugs that complete a collateral sensitivity cycle.** (a) Demonstration on the fitness levels of the cell populations classified in terms of sensitivity and resistance under the collaterally sensitive drugs. (b) Simulated effect of a sequence of the drugs based on the cell classification and fitness levels from (a) (i.e.,  $\{p_r, p_s, p_0\} = \{0.5, -0.7, 0.0\}$  for all drugs). Other used values are  $\{g_s, g_0\} = \{0.1, 0.05\}$  (transition rates) for all drug and  $\{R_1^0, R_2^0, R_3^0, R_4^0\} = \{0.05, 0.15, 0.2, 0.6\}$  (initial populations).

111 the optimal therapeutic strategy. To define control, we chose to minimize the area under the  
 112 total population curve over a chosen time interval  $[0, x]$  for some time  $x > 0$ ,

$$\int_0^x TP(t | \text{drug strategy}) dt, \quad (3)$$

113 for varying drug administrations. Our numerical study determined the treatment regimen  
 114 for the best possible effects to minimize (3). It can be achieved when the best drug(s) is  
 115 chosen at every given moment ( $t = t_1$ ). Here, the best drug(s) at  $t_1$  (e.g., *Drug i*) means  
 116 the drug(s) which have the highest effectiveness in decreasing total population (such that  
 117  $ef_i(t_1) \leq ef_j(t_1)$  for any  $j \in \{1, 2, \dots, N\}$ ), where the formulation of the drug effect is defined  
 118 in following way

$$ef_j(t_1) := TPD(t_1 | \mathcal{P}^j) = \mathcal{P}^j \cdot \mathcal{R}(t_1) \quad j \in \{1, 2, \dots, N\} \quad (4)$$

119 for *Drug j* at  $t_1$ .  $\mathcal{R}$  under the optimal strategy obeys the following system,

$$\frac{d\mathcal{R}}{dt} = \mathcal{D} \left( \underset{1 \leq i \leq N}{\operatorname{argmin}} ef_i(t) \right) \mathcal{R}. \quad (5)$$

120 While we are deriving a mathematically optimal therapy schedule, we realize it is imprac-  
 121 tical to instantaneously switch drugs in realistic clinical situations. Therefore, we developed  
 122 a simulation algorithm to choose and accordingly switch to an effective drug at a given

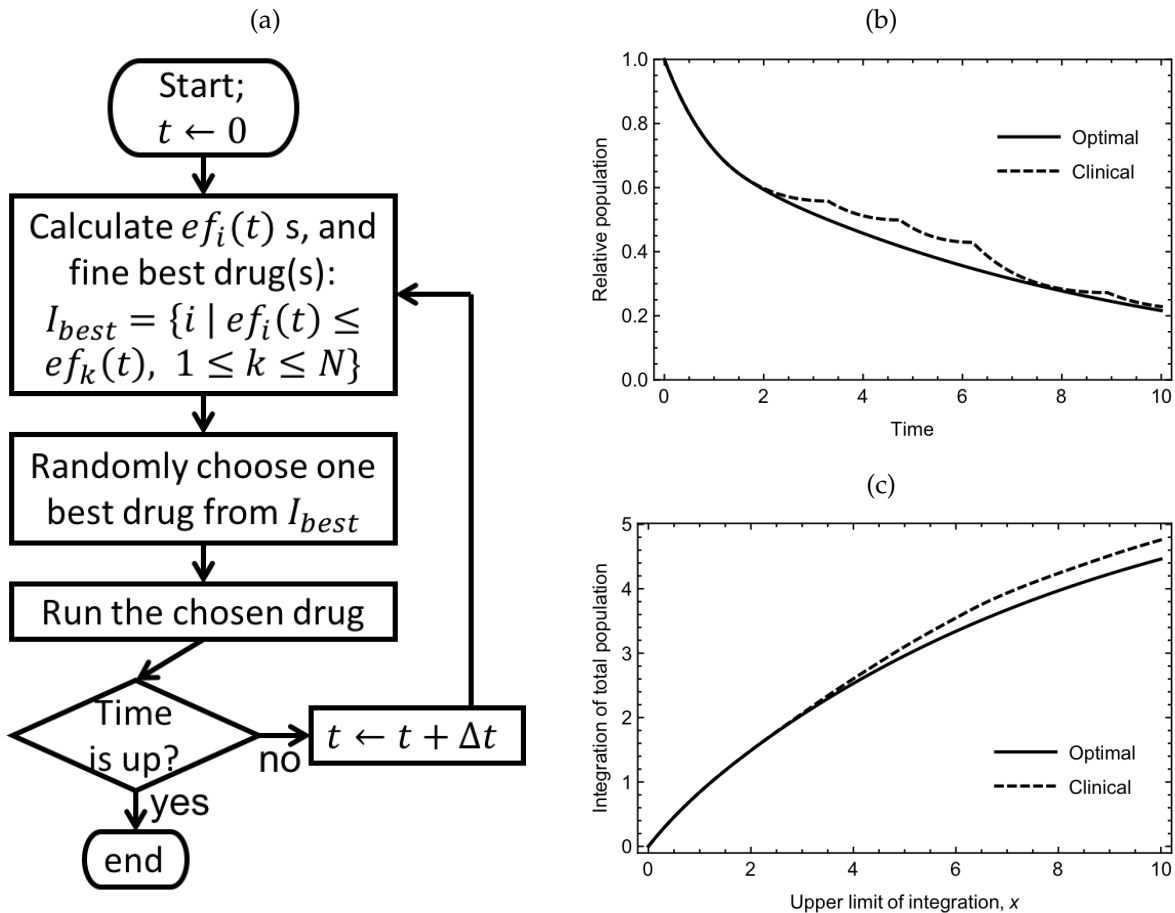

Figure 4: **Algorithm for practical realization of the optimal therapeutic strategy (System (5)).** (a) Flow chart of the optimal therapy algorithm. (b, c) Dynamical trajectories of the optimal strategy (solid curves) simulated through (a), compared to the trajectories of an example strategy relevant to the best possible standard clinical approach (minimum-point switches; dashed curves). The total populations of time histories is shown at Panel (b), and the integrations of total populations (3) from  $t = 0$  to varying upper limit ( $x$ -axis) is shown in Panel (c). Parameters/conditions are:  $\{p_r, p_s, p_0\} = \{0.2, 0.7, 0.0\}$  and  $\{g_s, g_0\} = \{0.05, 0.05\}$  for all drugs, and  $\{R_1^0, R_2^0, R_3^0, R_4^0\} = \{0.05, 0.15, 0.2, 0.6\}$ .

123 discrete time step ( $\Delta t \gtrsim 0$ ), which is described in Figure 4 (a) – where a longer  $\Delta t$  could be  
 124 considered for specific clinical situations. An example of the optimal administration simu-  
 125 lated with the discrete scheme, compared to a choice of non-optimal administration which  
 126 changes drugs at minimum time points of total population, is shown in Figure 4 (b, c). The  
 127 panel (b) shows tumor size, which is smaller with the optimal therapy over the time than the  
 128 size with the non-optimal therapy, and the panel (c) shows how much the optimal therapy  
 129 is better, measured by (3), in this example.

130

### 131 3.2 Properties of the optimal therapy

132 In this section, we will study several properties about the optimal therapeutic regimen based  
 133 on two examples of “symmetric” drug cycle (Figure 5) and an “asymmetric” drug cycle (Fig-  
 134 ure 6). We define symmetric drug cycle as a set of drugs which have an identical parameter  
 135 value for each type of dynamical event, i.e.,  $\{p_r^i, p_s^i, p_0^i, g_s^i, g_0^i\} = \{p_r, p_s, p_0, g_s, g_0\}$  for all  $i$ ,  
 136 and an asymmetric drug cycle as having different parameter values for at least one type of  
 137 dynamical event, i.e.,  $\{p_r^i, p_s^i, p_0^i, g_s^i, g_0^i\} \neq \{p_r^j, p_s^j, p_0^j, g_s^j, g_0^j\}$  for some  $i \neq j$ . We will begin  
 138 with the simpler case of symmetric drug cycles first and then generalize our observations to  
 139 asymmetric drug cycles.

140 In both cases simulated by the algorithm (Figure 4 (a)), there are up to  $N$  “stages” of time  
 141 periods in the optimal administration. (Figure 5, 6 (a)) We define a stage as a time interval in  
 142 which a same drug combination is involved. Starting initially with the most effective drug(s)  
 143 of the first stage, with progression to subsequent stages, one or more additional effective  
 144 drug(s) is chosen to start, and eventually at the last stage all the drugs are activated. (Figure  
 145 5, 6 (b,c)) The choice of the additional drugs and duration of the stages except the last stage  
 146 depend on the initial proportions of subpopulations and model parameters. This qualitative  
 147 change transitioning to the last stage is because by this time, the heterogeneity has been  
 148 effectively shaped by the previous stages of drug administration. The last stage starts with  
 149 a specific subpopulation makeup ( $\mathcal{R}^*$ ) that can be represented by the following expression,  
 150 if  $\{\mathcal{P}^1, \mathcal{P}^2, \dots, \mathcal{P}^N\}$  is linearly independent. (See by Theorem A.7 in Appendix.)

$$150 \quad \mathcal{R}^* = \frac{\mathcal{C}}{\|\mathcal{C}\|_1} \quad \text{where} \quad \mathcal{C} = \begin{pmatrix} (\mathcal{P}^1)^T \\ (\mathcal{P}^2)^T \\ \vdots \\ (\mathcal{P}^N)^T \end{pmatrix}^{-1} \mathbb{1}, \quad (6)$$

151 or simply,

$$152 \quad \mathcal{R}^* = \frac{1}{N} \mathbb{1},$$

153 in symmetric drugs (Corollary A.8). There exist possible parameter values which do not  
 154 hold the linear independence property, if they satisfy one of several strict conditions like  
 155 Theorem A.9. However, our analysis will focus on other general cases that the expression  
 156 (6) can be utilized.

157 The last stage lasts as long as therapy is necessary, keeping the same cellular makeup  
 158 meanwhile.

$$158 \quad \mathcal{R}(t) = TP(t) \mathcal{R}^* = e^{\lambda(t-t_{shape})} \mathcal{R}(t_{shape}) \quad \text{for} \quad t \geq t_{shape} \quad (7)$$

159 All the subpopulations and total population of the last stage are presumed to change expo-  
 160 nentially (See the comparison between the population curves and the light-gray guideline  
 161 curves on Figure 5, 6 (a)). For symmetric cases, it has been proved in Theorem A.10, that  
 162 the exponential rate is the average of proliferation rates of all subpopulations,

$$162 \quad \lambda = \frac{p_r + p_s + (N-2)p_0}{N}. \quad (8)$$

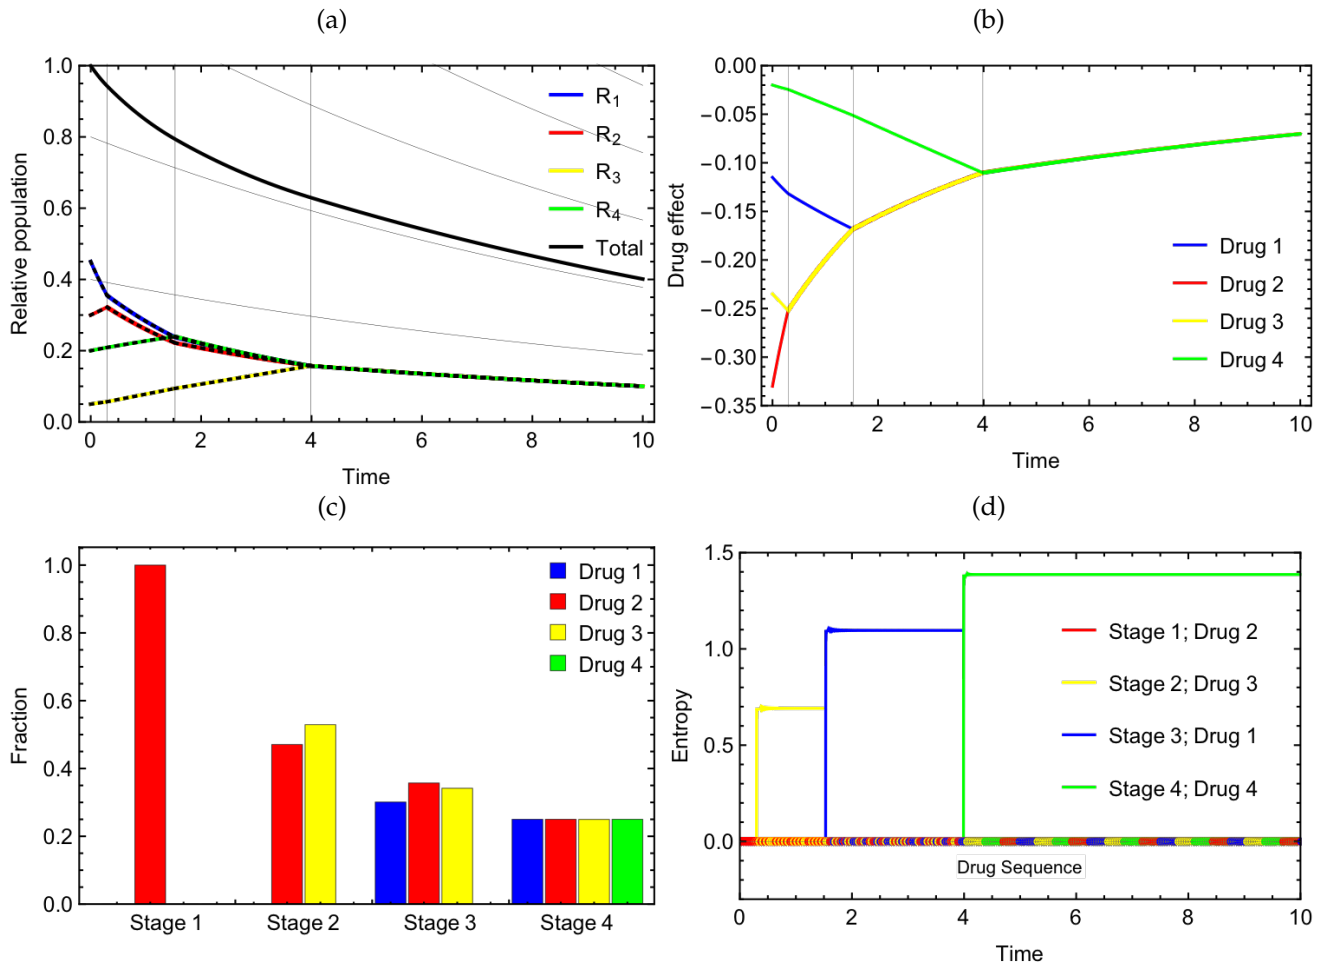

Figure 5: **Optimal therapeutic dynamics with a cycle of four symmetric drugs.** (a) Histories of subpopulations and total population with gray lines/curves indicating the ends of stages and exponential curves compatible to the last stage. (b) Effects of the drugs (rate of total population change under the drugs) measured by (4) along the optimal population dynamics. (c) Stage-wise relative frequencies of the drugs chosen in the optimal histories simulation by the algorithm (Figure 4 (a)). (d) Shannon entropy change over sequences of chosen drug indices starting from the beginning of each stage to the time points (x-axis). Selected drugs at every time points are indicated by the colored dots along the line of  $y = 0$ . Parameters for all panels are  $\{p_r, p_s, p_0\} = \{0.2, 0.7, 0.1\}$ ,  $\{g_s, g_0\} = \{0.1, 0.05\}$ ,  $\{R_1^0, R_2^0, R_3^0, R_4^0\} = \{0.45, 0.3, 0.05, 0.2\}$

163 All stages except the last one choose better drugs and gradually level the effectiveness of  
 164 all drugs evenly, so we will call those finite stages the “shaping period”. On the other hand,  
 165 in the last stage, drugs are equally effective for the shaped heterogeneous tumor, with all  
 166 drugs being given to continue this balanced effect (adaptive therapy period). The finding  
 167 of the optimal therapeutic regimen is consistent with our previous work [1] of 2 drugs, in  
 168 that (i) at each time point the best strategy of drug administration requires the drug(s) with  
 169 the highest current effectiveness, and (ii) the optimal administrations consist of a shaping  
 170 period and a period of adaptive therapy.



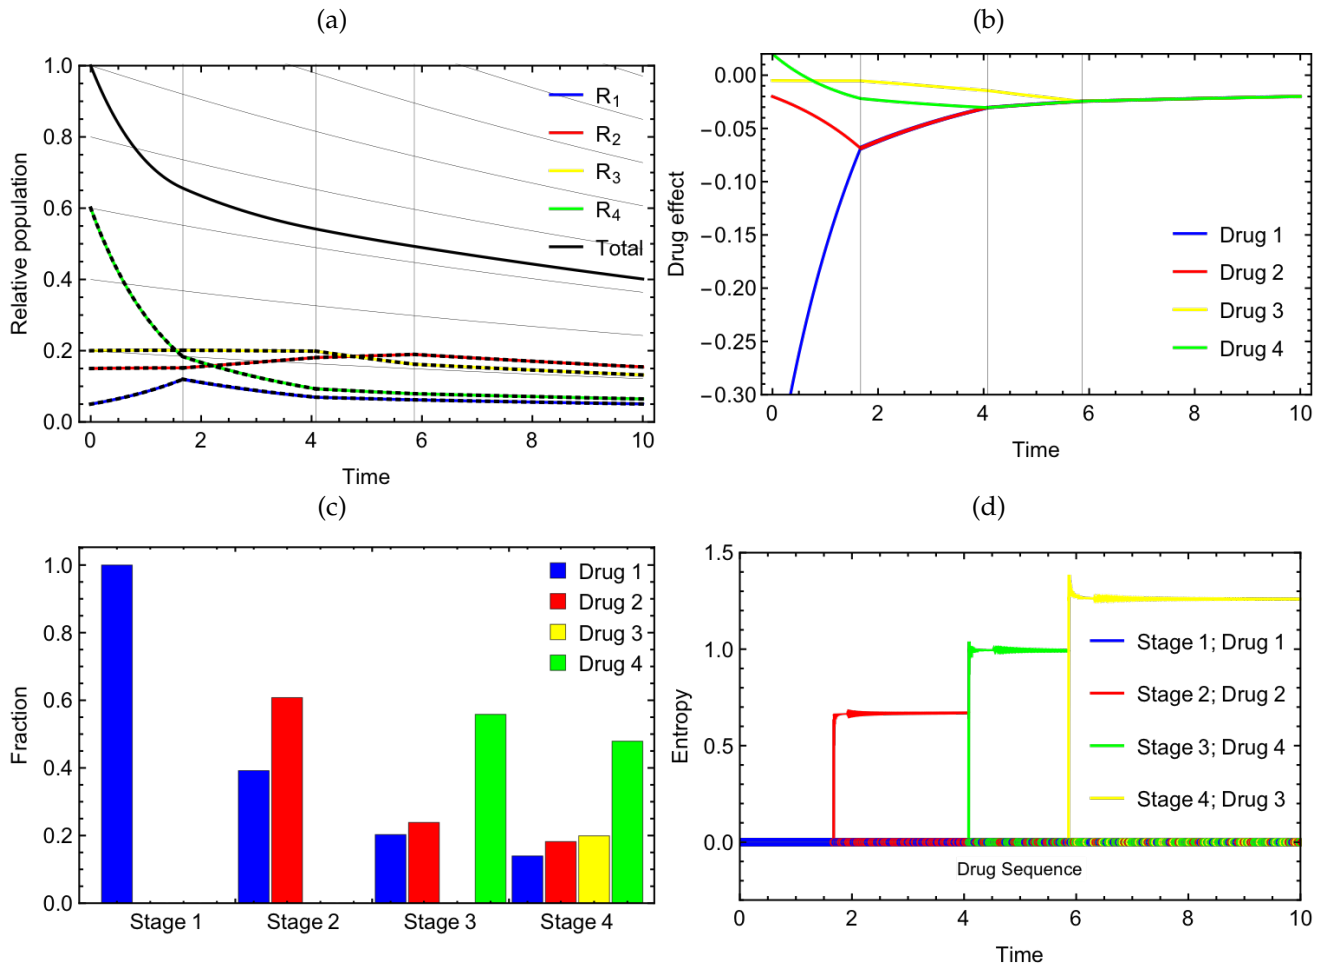

Figure 6: **Optimal therapeutic dynamics with a cycle of four asymmetric drugs.** Same types of plots with Figure 5 with four asymmetric drugs:  $\{p_r^1, p_s^1, p_0^1\} = \{0.5, 0.7, 0.0\}$ ,  $\{g_s^1, g_0^1\} = \{0.01, 0.005\}$ ,  $\{p_r^2, p_s^2, p_0^2\} = \{0.1, 0.7, 0.0\}$ ,  $\{g_s^2, g_0^2\} = \{0.01, 0.01\}$ ,  $\{p_r^3, p_s^3, p_0^3\} = \{0.2, 0.3, 0.0\}$ ,  $\{g_s^3, g_0^3\} = \{0.05, 0.05\}$ ,  $\{p_r^4, p_s^4, p_0^4\} = \{0.1, 0.2, 0.0\}$ ,  $\{g_s^4, g_0^4\} = \{0.001, 0.0005\}$ ,  $\{R_1^0, R_2^0, R_3^0, R_4^0\} = \{0.05, 0.15, 0.2, 0.6\}$

171 In a symmetric drug regimen, after the shaping period, all the subpopulations maintain  
 172 equal density (Stage 4 of Figure 5 (a)) with same intensity of drugs (Stage 4 of Figure 5 (c))  
 173 given in turn. However, in the other stages in the case of symmetric drugs, and all stages  
 174 in the case of asymmetric drugs, subpopulation makeup, relative drug intensities, and the  
 175 duration of the stages are nonuniform and infeasible to derive analytically. We can clarify  
 176 them only through numerical methods given drug parameters by running the System (5) in  
 177 a discrete way as we did for the examples in Figure 5, 6. For reference, in our previous work  
 178 [1], such quantities were able to clarify explicitly, since it only concerned two drugs.

179 Additionally, we have measured the Shannon entropy of the drug indices in the sequence  
 180 of drugs chosen along the algorithm in our examples. Despite the aperiodicities we observed  
 181 in the sequences, the entropy along the optimal trajectories are more or less consistent, i.e.,  
 182 flat entropy curves in each stage; Figures 5, 6 (d)) within each stage. This allows us to infer

183 that the sequences are almost periodic, and drug prescription does not significantly differ  
184 within these stages. Inspired by this observation, we plotted the dynamics of instantaneous  
185 drug cycles (Equation (2)) using the relative drug assignments of each stage found at Figures  
186 5, 6 (c). The relevant curves are indicated by the dashed curves in Figures 5, 6 (a). Based  
187 on their consistency to the algorithmic histories on the same panel, we can presume that the  
188 drug cycle would be periodic, but errors generated by the practical nonzero time step ( $t \gtrsim 0$ )  
189 result in minor aperiodicities.

## 190 4 Practical guidelines for optimal drug administration

191 Though we have derived the optimal therapeutic regimen for symmetric and asymmetric  
192 drug cycles in the previous section, there are practical barriers to applying this regimen in  
193 a clinical setting. It is unlikely that the drug parameters and initial tumor status as defined  
194 in our algorithm are known for real drugs and a real tumor in a real patient. Therefore, we  
195 propose a method of treatment to approximate this optimal therapy in two cases: when the  
196 sub-populations of each cell type are known and when only the total tumor cell population  
197 is known.

198 In each case, we use one or more 'testing periods' each lasting  $N\Delta t$  where  $\Delta t$  is the  
199 smallest possible period of single drug administration, and in reality, response measure-  
200 ment. In the  $N$  successive  $\Delta t$ -long time windows, all of the  $N$  drugs are given in turn, and  
201 the available population data is measured at the end of each window. After this procedure  
202 is performed, we will have discrete population data at  $N + 1$  time points

$$203 \quad \text{Pop}^k = \text{Pop}(t = k \Delta t) \quad \text{for} \quad k \in \{0, 1, \dots, N\}.$$

204 We base our 'realistic' strategy around total tumor population because of the recent  
205 explosion of robust techniques to obtain this information in a clinically relevant setting [22].  
206 In this particular method plasma cell-free DNA is sampled from a patient with relatively  
207 high temporal frequency and used to resolve the corresponding evolutionary dynamics.  
208 We use these techniques as a benchmark for clinically leverage-able tumor population data  
209 which can be implemented in an algorithm as we describe below.

### 210 4.1 Available data: subpopulations $\text{Pop} = \mathcal{R}$

211 Implementing the subpopulation data over just one single testing period (explained above),  
212 we derive several equations which represent the relationships between the data and drug  
213 parameters, and then, to find the parameter values. We will approach those problems for  
214 two conditions separately: two drugs  $N = 2$ , and three or more drugs  $N \geq 3$ .

215 In the case of two drugs, there are only two subpopulations  $\mathcal{R} = \{R_1, R_2\}$ , and three  
216 parameters for each drug  $i \in \{1, 2\}$  which are two proliferation rates  $\{p_r^i, p_s^i\}$  and one  
217 transition rate from sensitive to resistant types  $g^i$ . No subpopulation or parameters related  
218 to neutral cells is included in the system of two drugs. Solving the differential system (1)

219 with the initial conditions, we have the following equations for each  $\Delta t$ -long time window.

$$\begin{cases} S(t) = f_s(t; p_s - g_s; s_0) \\ R(t) = f_r(t; p_r, g_s; r_0, S) \end{cases} \quad (9)$$

220 where  $\{S, R\} = \{R_{i'}, R_i\}$ ,  $\{p_r, p_s; g\} = \{p_r^i, p_s^i; g^i\}$  and  $\{s_0, r_0\} = \mathcal{R}^{i-1} (= \text{Pop}^{i-1})$ . Applying  
 221 the data of next time point  $\{s_1, r_1\} = \mathcal{R}^i (= \text{Pop}^i)$  to (9), we can specify the equations with  
 222 drug parameters and known values only.

$$\begin{cases} s_1 = f_s(\Delta t; p_s - g_s; s_0) \\ r_1 = f_r(\Delta t; p_r, g_s; r_0, S) \end{cases} \quad (10)$$

223 Similarly, in the case of a larger number of drugs  $N \geq 3$ , we can solve (1),

$$\begin{cases} S(t) = f_s(t; p_s - g_s; s_0) \\ N(t) = f_0(t; p_0 - g_0, g_s; n_0, S) \\ R(t) = f_r(t; p_r, g_0; r_0, N) \end{cases} \quad (11)$$

224 where  $\{S, N, R\} = \{R_{i'}, \sum_{j \notin \{i, i'\}} R_j, R_i\}$  and  $\{p_r, p_s, p_0; g_s, g_0\} = \{p_r^i, p_s^i, p_0^i; g_s^i, g_0^i\}$ . Also,  
 225  $\{s_0, n_0, r_0\}$  and  $\{s_1, n_1, r_1\}$  are elements or the summations of elements in  $\text{Pop}^{i-1}$  and  $\text{Pop}^i$   
 226 respectively. Applying  $\{s_1, n_1, r_1\}$  to (11) yields,

$$\begin{cases} s_1 = f_s(\Delta t; p_s - g_s; s_0) \\ n_1 = f_0(\Delta t; p_0 - g_0, g_s; n_0, S) \\ r_1 = f_r(\Delta t; p_r, g_0; r_0, N) \end{cases} \quad (12)$$

227 Both (10) for the two-drug cases with three unknown parameters and (12) for  $N$ -drug  
 228 cases with five unknown parameters ( $N \geq 3$ ) are underdetermined. One strategy to resolve  
 229 this issue in either case is by assuming a specific ratio between proliferation rates and tran-  
 230 sition rates, i.e.,  $|p_s| = \alpha g$  for 2 drugs and  $\{|p_s|, |p_0|\} = \{\alpha_s g_s, \alpha_0 g_0\}$  for more drugs, with a  
 231 reasonably chosen  $\alpha, \alpha_s, \alpha_0 \in (0, 1)$  like  $\alpha = 0.1$ . Then, using the conditions and equations  
 232 (10 or 12) along with the data from one testing period, we can infer all the drug parameters.  
 233 The discovered parameters will give the complete information required to run the algorithm  
 234 of optimal administration (Figure 4 (a)).

## 235 4.2 Available data: total population only $\text{Pop} = TP$

236 In most cases of cancer, however, detailed information about tumor heterogeneity cannot  
 237 be detected over time. Clinically, total tumor size is the highest resolution data that can  
 238 be reasonably (and even then poorly) measured. For such cases with limited data, rather  
 239 than trying to solve the differential equations as shown in the previous section, we tried to  
 240 approximate drug effects using the levels of changes of the total population data of testing  
 241 period, and checked which drug(s) are most reasonable to prescribe. The chosen drug or  
 242 drugs is continually prescribed as long as it is effective, and its effects are continuously  
 243 monitored. When the chosen drug loses efficacy, we need to select drugs again. Since we

244 will not know sub-populations and drug parameters, the equation (4) is not applicable. In-  
 245 stead, another  $(N\Delta t)$ -long testing period is required to choose the drugs of the next 'round'.  
 246 Therefore, in our algorithm of optimal prescription only with total population monitored,  
 247 we suggest to pair up "testing" period and "therapy" period, and repeat them (See Figure  
 248 7 (b)). Even though the testing period can transiently worsen outcomes compared to stan-  
 249 dard therapies for a finite period of time, it is the only way to ascertain the relative strength  
 250 of each drugs selection pressure. So, we strived to reduce the time taken for each testing  
 251 period. One way we implemented this in our algorithm was to choose and apply multiple  
 252 effective drugs, rather than one single best drug. We chose this strategy because utilizing a  
 253 strict criterion of drug selection would not allow for currently chosen drugs to be effective  
 254 for a long time and would require a change of drug more frequently.

255 Now, let us describe our algorithm for optimal therapeutic prescription (Figure 7 (b))  
 256 with only total tumor cell population trackable. We measure the effect of Drug  $i$  ( $i \in$   
 257  $\{1, 2, \dots, N\}$ ) by the approximate derivative,

$$258 \quad \tilde{ef}_i = \frac{TP(i\Delta t) - TP((i-1)\Delta t)}{\Delta t} \left( = \frac{Pop^i - Pop^{i-1}}{\Delta t} \right).$$

259 From the evaluated  $\tilde{ef}_i$ s, we choose the effective drug(s), based on the current status of the  
 260 tumor,

$$261 \quad I_{eff} = \{i \mid \tilde{ef}_i \in B(ef^m; \epsilon |ef^m|)\},$$

262 based on the highest effect,

$$263 \quad ef^m = \text{Min} \{\tilde{ef}_i \mid 1 \leq i \leq N\},$$

264 and the parameter of effective drug interval ( $\epsilon$ ). Another important quantity included in the  
 265 algorithm is the threshold of the drug effectiveness necessary to determine if we can keep  
 266 using the current drug(s) or need to re-select drug(s),

$$267 \quad ef^* = (1 - \eta) \text{Mean} \{\tilde{ef}_i \mid i \in I_{eff}\} + \eta \text{Min} \{\tilde{ef}_i \mid i \notin I_{eff}\},$$

268 which is between the average effect of "effective" drugs, and the highest effect of "ineffec-  
 269 tive" drugs. In our study, we simply fixed the threshold parameter,  $\eta = 0.5$  (See Figure 7 (a)  
 270 for the visualized explanations about the values and parameters in the algorithm.).

271 Our algorithm of approximated optimal therapy was compared to the actual optimal  
 272 therapy by measuring the area between population curves, in two ways. Using total popu-  
 273 lation curves, we measured

$$274 \quad \int |TP(t|\text{optimal therapy}) - TP(t|\text{approx. optimal therapy})| dt,$$

275 and using subpopulations curves,

$$276 \quad \int \sum_{k=1}^N |R_k(t|\text{optimal therapy}) - R_k(t|\text{approx. optimal therapy})| dt.$$

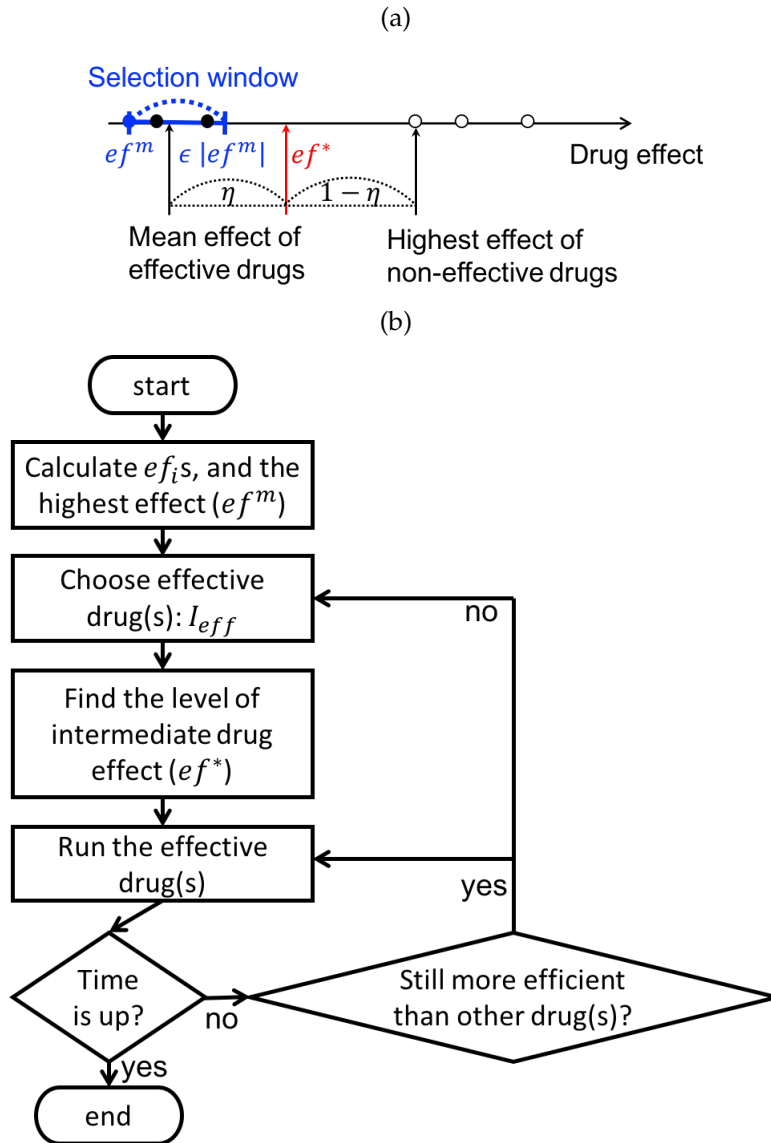

Figure 7: **Algorithm for the administration of the optimal drug schedules when total population data is available, but not subpopulation nor drug parameters.** (a) Diagram of the classification of “effective” and “ineffective” drugs, and the threshold of drug effectiveness ( $ef^*$ ). The effectiveness levels of the most effective drug ( $ef^m$ ), effective drugs and ineffective drugs are indicated by blue-filled circle, black-filled circles and empty circles, respectively. (b) Flow chart of the optimal therapy algorithm based on the “effective” drugs from (a).

277 Using both methods, we found that both strategies which were too strict or too generous  
 278 do not generate tumor histories close enough to the optimal one (See Figure 8 (b)). A  
 279 proper level of drug selection window is necessary, like our example case of Figure 8 in  
 280 which the approximation is reasonably close with  $\epsilon \approx 0.03$  (See Figure 8 (a)). It is an  
 281 expected observation, because a strict drug selection strategy will require unnecessarily  
 282 frequent testing periods, and a generous strategy will include barely effective drugs as well  
 283 in the treatment.

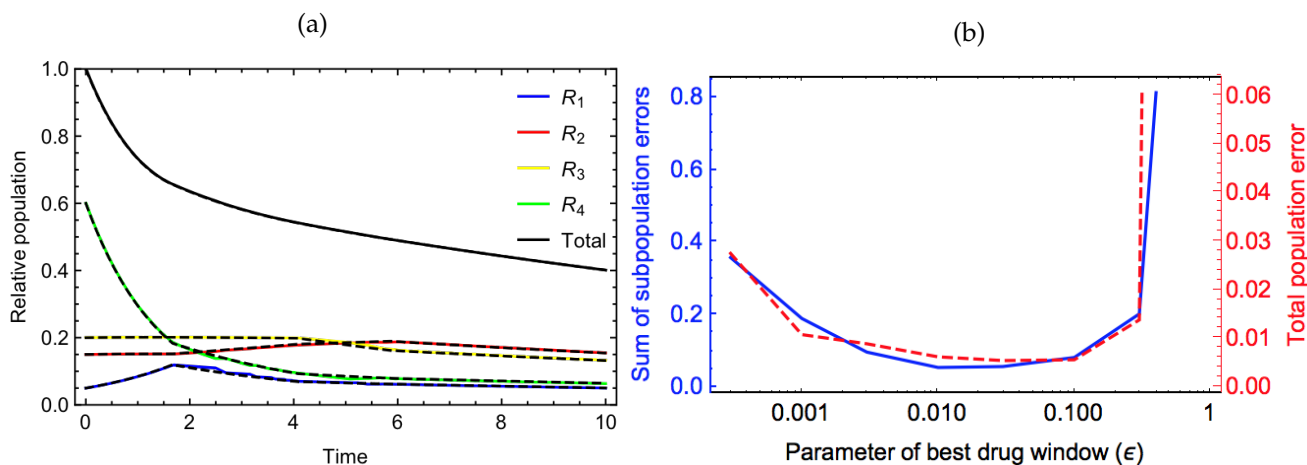

Figure 8: **Comparison between the realistic approximation of the optimal therapy (by the algorithm on Figure 7 (b)), and the actual optimal strategy.** (a) Optimal therapeutic effect generated by the practical algorithm assuming that only total population is trackable (solid curves) with  $\epsilon = 0.03$  and  $\eta = 0.5$ , compared to the effect of the optimal therapy in theory (dashed curves). Other used parameters and initial tumor status are the same as in the example in Figure 6. (b) Errors between the approximated and actual optimal histories, over the range of the parameter of effective drug window.

## 284 5 Conclusions and discussion

285 The phenomena of collateral sensitivity presents an opportunity to improve effectiveness  
 286 in drug therapy without the need for drug discovery, a process that requires enormous  
 287 amounts of time and money. Taking advantage of CS clinically however, requires a better  
 288 understanding, of the evolutionary dynamics under changing therapy. To address this, we  
 289 developed a mathematical model of ordinary differential equations describing the effect of  
 290 a collaterally sensitive drug cycles, and explored the optimal treatment regimens within the  
 291 confines of this simplified model. Consequently, we found that the optimal therapeutic effect  
 292 can be derived when we switch drug to the best-effect-drug at every moment. While this is  
 293 somewhat intuitive, choosing the timing, and order of switching is a difficult prospect given  
 294 the lack of perfect data in clinical settings, and given the heterogeneity which is hallmark of  
 295 cancer.

296 In our ODE model, drug switching is implemented by changing drug-dependent pa-  
 297 rameters ( $\mathcal{P}^i$ ) and transitions between cell types. In accordance with the ‘optimal’ drug  
 298 schedule, drugs are switched instantaneously after the first stage of single-drug therapy.  
 299 However, such rapid switching is not feasible clinically. To address this, we developed a  
 300 time-series algorithm mimicking the ODE system and the nearly instantaneous switches  
 301 (Figure 4 (a)). As expected, the algorithm-based simulation is smooth with a small time step  
 302 (Figure 4 (b)) and shows a good consistency with the ODE system (Figure 5, 6 (a)).

303 The order of the drug sequence in each stage of our example simulations is not exactly  
 304 periodic, even though the pattern of periodicity is (at least vaguely) observed (Figure 5, 6  
 305 (d)). Also, in the last stages where all the drugs are involved, *Drug i* is not always followed  
 306 by *Drug i'*. However, the drug combinations of a complete drug cycle is needed to control

Table 1: Definitions of parameters and variables related to System (1)

| variables/parameters                         | descriptions                                                                                                                                                                                                                                                                                                                                                                                                                                                                          |
|----------------------------------------------|---------------------------------------------------------------------------------------------------------------------------------------------------------------------------------------------------------------------------------------------------------------------------------------------------------------------------------------------------------------------------------------------------------------------------------------------------------------------------------------|
| $N$                                          | number of drugs in cycle                                                                                                                                                                                                                                                                                                                                                                                                                                                              |
| $i$                                          | index of a chosen drug, $i \in \{1, 2, \dots, N\}$                                                                                                                                                                                                                                                                                                                                                                                                                                    |
| $i'$                                         | index of the drug whose resistant factor is sensitive to <i>Drug</i> $i$ ,<br>$i - 1$ for $i \geq 2$ , and $N$ for $i = 1$                                                                                                                                                                                                                                                                                                                                                            |
| $t$                                          | time variable                                                                                                                                                                                                                                                                                                                                                                                                                                                                         |
| $[0, t_{shape}]$                             | time interval of shaping period                                                                                                                                                                                                                                                                                                                                                                                                                                                       |
| $R_i$                                        | cell population resistant under <i>Drug</i> $i$ , sensitive under <i>Drug</i> $i + 1$<br>(for $i < N$ ) or <i>Drug</i> 1 (for $i = N$ ) and neutral under all the other drugs                                                                                                                                                                                                                                                                                                         |
| $\mathcal{R}$                                | vector of subpopulations, $\mathcal{R} = (R_1 \ \dots \ R_N)^T$                                                                                                                                                                                                                                                                                                                                                                                                                       |
| $\mathcal{R}^*$                              | population fractions (i.e., $\sum_{k=1}^N R_k^* = 1$ ) at which all the drugs<br>are equally effective, $\mathcal{R}^* = (R_1^* \ \dots \ R_N^*)^T$                                                                                                                                                                                                                                                                                                                                   |
| $TP(t)$                                      | total population, $TP(t) = \sum_{k=1}^N R_k(t)$                                                                                                                                                                                                                                                                                                                                                                                                                                       |
| $TPD(t)$                                     | derivative of total population, $TPD(t) = TP'(t)$                                                                                                                                                                                                                                                                                                                                                                                                                                     |
| $p_r^i$                                      | proliferation rate of cells resistant to <i>Drug</i> $i$                                                                                                                                                                                                                                                                                                                                                                                                                              |
| $p_s^i$                                      | proliferation rate of cells sensitive to <i>Drug</i> $i$                                                                                                                                                                                                                                                                                                                                                                                                                              |
| $p_0^i$                                      | proliferation rate of cells neutral to <i>Drug</i> $i$                                                                                                                                                                                                                                                                                                                                                                                                                                |
| $\mathcal{P}^i \in \mathbb{R}^N$             | vector of proliferation rates under <i>Drug</i> $i$ ,<br>$\mathcal{P}^i := \begin{pmatrix} p_j^i \end{pmatrix} \text{ with } p_j^i = \begin{cases} p_r^i & \text{if } j = i \\ p_s^i & \text{if } j = i' \\ p_0^i & \text{otherwise} \end{cases}$                                                                                                                                                                                                                                     |
| $g_s^i \ (\bar{g}_s^i)$                      | transition rate from sensitive to all neutral types (each neutral type)<br>under <i>Drug</i> $i$ , $\bar{g}_s^i := g_s^i / (N - 2)$                                                                                                                                                                                                                                                                                                                                                   |
| $g_0^i$                                      | transition rate from neutral to resistant types under <i>Drug</i> $i$                                                                                                                                                                                                                                                                                                                                                                                                                 |
| $\{\lambda_r^i, \lambda_s^i, \lambda_0^i\}$  | per capita turnover rates for the three types of cells under <i>Drug</i> $i$ ,<br>$\lambda_r^i := p_r^i, \lambda_s^i := p_s^i - g_s^i, \lambda_0^i := p_0^i - g_0^i$                                                                                                                                                                                                                                                                                                                  |
| $\mathcal{D}(i) \in \mathbb{R}^{N \times N}$ | matrix of rate parameters in population dynamics under <i>Drug</i> $i$ ,<br>$\mathcal{D}(i) := \begin{pmatrix} d_{j,k}^i \end{pmatrix} \text{ with } d_{j,k}^i = \begin{cases} \lambda_r^i & \text{if } j = k = i \\ \lambda_s^i & \text{if } j = k = i' \\ \lambda_0^i & \text{if } j = k \notin \{i, i'\} \\ \bar{g}_0^i & \text{if } j = i \text{ and } k \notin \{i, i'\} \\ \bar{g}_s^i & \text{if } k = i' \text{ and } j \notin \{i, i'\} \\ 0 & \text{otherwise} \end{cases}$ |
| $ef_i$                                       | effect of <i>Drug</i> $i$                                                                                                                                                                                                                                                                                                                                                                                                                                                             |
| $\tilde{ef}_i$                               | approximated effect of <i>Drug</i> $i$                                                                                                                                                                                                                                                                                                                                                                                                                                                |

307 tumors. Specifically, if there is a flaw in suppressing one type of cell population, even if its  
 308 population was very small at the beginning, it can exponentially increase at the end (Figure  
 309 9) - much like the concept of evolutionary escape.

310 In our research, the measure of drug effect at a specific time point is defined by the  
 311 instantaneous rate of change in total tumor size under the drug (Equation 4). It is therefore

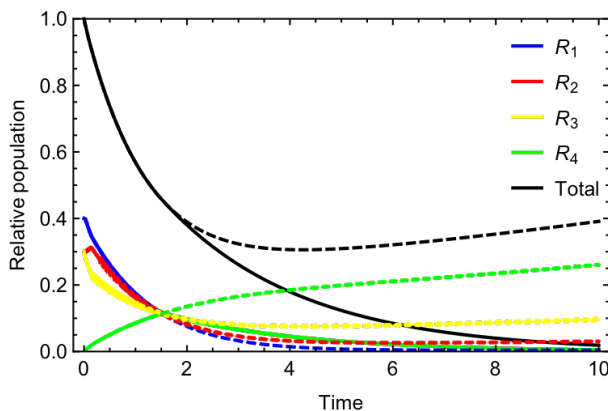

Figure 9: **Comparison between the effects of a complete collaterally sensitive drug cycle and an incomplete cycle.** The complete cycle is comprised by all the four drugs (relevant to the solid curves), and the incomplete cycle is by only *Drug 2*, *Drug 3* and *Drug 4* with *Drug 1* being dropped (relevant to the dashed curves). Used values:  $\{p_r, p_s, p_0\} = \{1.0, 2.5, 0.0\}$ ,  $\{g_s, g_0\} = \{0.25, 0.25\}$  for all drugs,  $\{R_1^0, R_2^0, R_3^0, R_4^0\} = \{0.4, 0.3, 0.3, 0.0\}$

312 dependent on the heterogeneity in the tumor comprising the tumor at a given moment and  
 313 how effective the drug is to each cell type. Hence, if the cell composition and/or drug  
 314 parameters are unknown, we cannot measure the drug effect and therefore the optimal  
 315 drug switch timing cannot be captured. For such cases, which is the majority of cancers,  
 316 we developed an algorithm within which drugs are selected based on only total population  
 317 (Figure 7(b)). Cell population dynamics with this algorithm show a good consistency with  
 318 the fully informed optimal therapeutic strategy (Figure 8 (a)). The traditional time gaps  
 319 required to obtain updated diagnostics and prescription is several weeks or months, [22]  
 320 which would be too long to expect a result close to an optimal solution as we aim for here.  
 321 Based on the results of our algorithm simulation (Figure 8 (a)), it is evident that performance  
 322 of the algorithm degrades with increasing time between updates – suggesting an avenue of  
 323 study to formally optimize the costs and benefits of this time, though that is beyond the  
 324 scope of this work.

325 There are many collateral sensitivity relationships found among antibiotics [27, 34] and  
 326 anticancer [13] drugs. A collaterally sensitive drug cycle is a chain of such relationships with  
 327 various lengths ( $> 2$ ) [13] or more. It is possible that the increased sensitivity shown after  
 328 another drug could be a temporal phenomenon happening in a specific status, which is too  
 329 complicated to recapitulate within this structure. Also, even if a part of the cell population  
 330 follows the dynamics of a rotating resistance and sensitivity pattern, there could be many  
 331 more types of cells not involved in any cell types within this structure, which will result  
 332 in treatment failure, as we discussed in Figure 9. A detailed study with antibiotics [27]  
 333 applied empirical fitness measurements to assign cellular classifications with genes and  
 334 drug-induced transitions among the genotypes. Finding best-case therapy ordering in multi-  
 335 drug scenarios was also studied by Maltas et al. without reliance on the underlying fitness  
 336 landscape, somewhat akin to our “imperfect” clinical information, and found that therapy  
 337 could be improved. [35]

338 Each of these previous studies assume that the dynamics measured at the beginning of



339 the study do not change through time. Given the importance of (epi-)mutation, and not  
340 just changing frequencies, it is uncertain on what timescales this is a fair assumption. [9]  
341 Another simplification we have made is to assume that there is no interaction between cell-  
342 types, something which has been shown in at least breast [36], lung [17] and pancreatic  
343 cancers [37]. However, we believe our cell classification structure is meaningful in that it  
344 reflects collateral sensitivity phenomena reasonably and the simplicity of the corresponding  
345 linear ODE system enables analytic study.

346 In addition, our system and corresponding analysis lend well to the theoretical and  
347 clinical framework of adaptive therapy [2]. In adaptive therapy, drug administration is  
348 alternated with drug holidays to minimize tumor growth and resistant cell population. The  
349 central issues of optimal time for drug switching to maintain an optimal sub-population  
350 structure is apropos to the issues explored in this and our own previous work. Adaptive  
351 therapy has demonstrated clinical utility in markedly improving tumor response for a subset  
352 of cancers in theory, [3] in pre-clinical models [38] and clinically [39]. While this purely  
353 theoretical study should not be used to inform clinical care at this time, [40] we submit  
354 that further application of the techniques herein present a way forward for precise timing  
355 of drug switching to further optimize single drug adaptive therapy and higher order drug  
356 sequences alike.

## 357 References

- 358 [1] N. Yoon, R. Vander Velde, A. Marusyk, and J. G. Scott, "Optimal therapy scheduling  
359 based on a pair of collaterally sensitive drugs," *Bulletin of mathematical biology*, pp. 1–34,  
360 2018.
- 361 [2] R. A. Gatenby, A. S. Silva, R. J. Gillies, and B. R. Frieden, "Adaptive therapy," *Cancer  
362 research*, vol. 69, no. 11, pp. 4894–4903, 2009.
- 363 [3] J. West, L. You, J. Zhang, R. A. Gatenby, J. S. Brown, P. K. Newton, and A. R. Anderson,  
364 "Towards multidrug adaptive therapy," *Cancer research*, vol. 80, no. 7, pp. 1578–1589,  
365 2020.
- 366 [4] M. M. Gottesman, "Mechanisms of cancer drug resistance," *Annual review of medicine*,  
367 vol. 53, no. 1, pp. 615–627, 2002.
- 368 [5] C. Holohan, S. Van Schaeybroeck, D. B. Longley, and P. G. Johnston, "Cancer drug  
369 resistance: an evolving paradigm," *Nature Reviews Cancer*, vol. 13, no. 10, p. 714, 2013.
- 370 [6] G. Housman, S. Byler, S. Heerboth, K. Lapinska, M. Longacre, N. Snyder, and S. Sarkar,  
371 "Drug resistance in cancer: an overview," *Cancers*, vol. 6, no. 3, pp. 1769–1792, 2014.
- 372 [7] M. E. Gorre, M. Mohammed, K. Ellwood, N. Hsu, R. Paquette, P. N. Rao, and C. L.  
373 Sawyers, "Clinical resistance to sti-571 cancer therapy caused by bcr-abl gene mutation  
374 or amplification," *Science*, vol. 293, no. 5531, pp. 876–880, 2001.

- 375 [8] S. Kobayashi, T. J. Boggon, T. Dayaram, P. A. Jänne, O. Kocher, M. Meyerson, B. E.  
376 Johnson, M. J. Eck, D. G. Tenen, and B. Halmos, "Egfr mutation and resistance of non-  
377 small-cell lung cancer to gefitinib," *New England Journal of Medicine*, vol. 352, no. 8,  
378 pp. 786–792, 2005.
- 379 [9] R. Vander Velde, N. Yoon, V. Marusyk, A. Durmaz, A. Dhawan, D. Miroshnychenko,  
380 D. Lozano-Peral, B. Desai, O. Balynska, J. Poleszhuk, *et al.*, "Resistance to targeted ther-  
381 apies as a multifactorial, gradual adaptation to inhibitor specific selective pressures,"  
382 *Nature communications*, vol. 11, no. 1, pp. 1–13, 2020.
- 383 [10] L. J. Piddock, "Multidrug-resistance efflux pumps? not just for resistance," *Nature*  
384 *Reviews Microbiology*, vol. 4, no. 8, p. 629, 2006.
- 385 [11] W. Löscher and H. Potschka, "Drug resistance in brain diseases and the role of drug  
386 efflux transporters," *Nature Reviews Neuroscience*, vol. 6, no. 8, p. 591, 2005.
- 387 [12] O. Trédan, C. M. Galmarini, K. Patel, and I. F. Tannock, "Drug resistance and the  
388 solid tumor microenvironment," *Journal of the National Cancer Institute*, vol. 99, no. 19,  
389 pp. 1441–1454, 2007.
- 390 [13] A. Dhawan, D. Nichol, F. Kinose, M. E. Abazeed, A. Marusyk, E. B. Haura, and J. G.  
391 Scott, "Collateral sensitivity networks reveal evolutionary instability and novel treat-  
392 ment strategies in alk mutated non-small cell lung cancer," *Scientific reports*, vol. 7,  
393 no. 1, p. 1232, 2017.
- 394 [14] A. Marusyk and K. Polyak, "Tumor heterogeneity: causes and consequences," *Biochim-*  
395 *ica et Biophysica Acta (BBA)-Reviews on Cancer*, vol. 1805, no. 1, pp. 105–117, 2010.
- 396 [15] P. M. Altrock, L. L. Liu, and F. Michor, "The mathematics of cancer: integrating quan-  
397 titative models," *Nature Reviews Cancer*, vol. 15, no. 12, pp. 730–745, 2015.
- 398 [16] D. Basanta, M. Simon, H. Hatzikirou, and A. Deutsch, "Evolutionary game theory  
399 elucidates the role of glycolysis in glioma progression and invasion," *Cell proliferation*,  
400 vol. 41, no. 6, pp. 980–987, 2008.
- 401 [17] A. Kaznatcheev, R. Vander Velde, J. G. Scott, and D. Basanta, "Cancer treatment  
402 scheduling and dynamic heterogeneity in social dilemmas of tumour acidity and vas-  
403 culature," *British journal of cancer*, vol. 116, no. 6, p. 785, 2017.
- 404 [18] A. Kaznatcheev, J. Peacock, D. Basanta, A. Marusyk, and J. G. Scott, "Fibroblasts and  
405 alectinib switch the evolutionary games played by non-small cell lung cancer," *Nature*  
406 *ecology & evolution*, vol. 3, no. 3, p. 450, 2019.
- 407 [19] M. Gluzman, J. G. Scott, and A. Vladimirovsky, "Optimizing adaptive cancer therapy:  
408 dynamic programming and evolutionary game theory," *Proceedings of the Royal Society*  
409 *B*, vol. 287, no. 1925, p. 20192454, 2020.
- 410 [20] J. Goldie and A. Coldman, "Quantitative model for multiple levels of drug resistance  
411 in clinical tumors.," *Cancer treatment reports*, vol. 67, no. 10, pp. 923–931, 1983.

- 412 [21] C. Tomasetti and D. Levy, "An elementary approach to modeling drug resistance in  
413 cancer," *Mathematical biosciences and engineering: MBE*, vol. 7, no. 4, p. 905, 2010.
- 414 [22] K. H. Khan, D. Cunningham, B. Werner, G. Vlachogiannis, I. Spiteri, T. Heide, J. F.  
415 Mateos, A. Vatsiou, A. Lampis, M. D. Damavandi, *et al.*, "Longitudinal liquid biopsy  
416 and mathematical modeling of clonal evolution forecast time to treatment failure in  
417 the prospect-c phase ii colorectal cancer clinical trial," *Cancer discovery*, vol. 8, no. 10,  
418 pp. 1270–1285, 2018.
- 419 [23] H. Cho and D. Levy, "Modeling continuous levels of resistance to multidrug therapy in  
420 cancer," *Applied Mathematical Modelling*, vol. 64, pp. 733–751, 2018.
- 421 [24] H. Cho, K. Ayers, L. de Pills, Y.-H. Kuo, J. Park, A. Radunskaya, and R. C. Rockne,  
422 "Modelling acute myeloid leukaemia in a continuum of differentiation states," *Letters  
423 in biomathematics*, vol. 5, no. sup1, pp. S69–S98, 2018.
- 424 [25] J. G. Scott, A. G. Fletcher, A. R. Anderson, and P. K. Maini, "Spatial metrics of tu-  
425 mour vascular organisation predict radiation efficacy in a computational model," *PLoS  
426 computational biology*, vol. 12, no. 1, p. e1004712, 2016.
- 427 [26] K. A. Rejniak, "A single-cell approach in modeling the dynamics of tumor microre-  
428 gions," *Math. Biosci. Eng.*, vol. 2, no. 3, pp. 643–655, 2005.
- 429 [27] D. Nichol, P. Jeavons, A. G. Fletcher, R. A. Bonomo, P. K. Maini, J. L. Paul, R. A.  
430 Gatenby, A. R. Anderson, and J. G. Scott, "Steering evolution with sequential therapy  
431 to prevent the emergence of bacterial antibiotic resistance," *PLoS computational biology*,  
432 vol. 11, no. 9, p. e1004493, 2015.
- 433 [28] R. C. Rockne, A. Hawkins-Daarud, K. R. Swanson, J. P. Sluka, J. A. Glazier, P. Macklin,  
434 D. A. Hormuth II, A. M. Jarrett, E. A. Lima, J. T. Oden, *et al.*, "The 2019 mathematical  
435 oncology roadmap," *Physical biology*, vol. 16, no. 4, p. 041005, 2019.
- 436 [29] S. Misale, F. Di Nicolantonio, A. Sartore-Bianchi, S. Siena, and A. Bardelli, "Resistance  
437 to anti-egfr therapy in colorectal cancer: from heterogeneity to convergent evolution,"  
438 *Cancer discovery*, vol. 4, no. 11, pp. 1269–1280, 2014.
- 439 [30] K. Dingle, C. Q. Camargo, and A. A. Louis, "Input–output maps are strongly biased  
440 towards simple outputs," *Nature communications*, vol. 9, no. 1, p. 761, 2018.
- 441 [31] J. Scott and A. Marusyk, "Somatic clonal evolution: A selection-centric perspective,"  
442 *Biochimica et Biophysica Acta (BBA)-Reviews on Cancer*, vol. 1867, no. 2, pp. 139–150, 2017.
- 443 [32] C. B. Ogbunugafor, C. S. Wylie, I. Diakite, D. M. Weinreich, and D. L. Hartl, "Adap-  
444 tive landscape by environment interactions dictate evolutionary dynamics in models of  
445 drug resistance," *PLoS computational biology*, vol. 12, no. 1, 2016.
- 446 [33] S. Iram, E. Dolson, J. Chiel, J. Pelesko, N. Krishnan, Ö. Güngör, B. Kuznets-Speck,  
447 S. Deffner, E. Ilker, J. G. Scott, *et al.*, "Controlling the speed and trajectory of evolution  
448 with counterdiabatic driving," *bioRxiv*, p. 867143, 2019.

- 449 [34] D. Nichol, J. Rutter, C. Bryant, A. M. Hujer, S. Lek, M. D. Adams, P. Jeavons, A. R.  
450 Anderson, R. A. Bonomo, and J. G. Scott, "Antibiotic collateral sensitivity is contingent  
451 on the repeatability of evolution," *Nature communications*, vol. 10, no. 1, p. 334, 2019.
- 452 [35] J. Maltas and K. B. Wood, "Pervasive and diverse collateral sensitivity profiles in-  
453 form optimal strategies to limit antibiotic resistance," *PLoS biology*, vol. 17, no. 10,  
454 p. e3000515, 2019.
- 455 [36] A. Marusyk, D. P. Tabassum, P. M. Altrock, V. Almendro, F. Michor, and K. Polyak,  
456 "Non-cell-autonomous driving of tumour growth supports sub-clonal heterogeneity,"  
457 *Nature*, vol. 514, no. 7520, pp. 54–58, 2014.
- 458 [37] M. Archetti, D. A. Ferraro, and G. Christofori, "Heterogeneity for igf-ii production  
459 maintained by public goods dynamics in neuroendocrine pancreatic cancer," *Proceed-  
460 ings of the National Academy of Sciences*, vol. 112, no. 6, pp. 1833–1838, 2015.
- 461 [38] P. M. Enriquez-Navas, Y. Kam, T. Das, S. Hassan, A. Silva, P. Foroutan, E. Ruiz, G. Mar-  
462 tinez, S. Minton, R. J. Gillies, *et al.*, "Exploiting evolutionary principles to prolong tu-  
463 mor control in preclinical models of breast cancer," *Science translational medicine*, vol. 8,  
464 no. 327, pp. 327ra24–327ra24, 2016.
- 465 [39] J. Zhang, J. J. Cunningham, J. S. Brown, and R. A. Gatenby, "Integrating evolutionary  
466 dynamics into treatment of metastatic castrate-resistant prostate cancer," *Nature com-  
467 munications*, vol. 8, no. 1, pp. 1–9, 2017.
- 468 [40] R. Brady and H. Enderling, "Mathematical models of cancer: when to predict novel  
469 therapies, and when not to," *Bulletin of mathematical biology*, vol. 81, no. 10, pp. 3722–  
470 3731, 2019.

## 471 **Appendix A Differential system of instantaneous drug switch**

472 **Definition** In addition to the definitions from Table 1, we defines further notations to facil-  
473 itate the descriptions on proofs.

474 
$$\mathcal{D}_i := \mathcal{D}(i) \in \mathbb{R}^{N \times N}, \mathcal{M}_i(t) := \left( m_{j,k}^i(t) \right) \in \mathbb{R}^{N \times N}, \mathcal{L}_{i,\epsilon} := \mathcal{M}_i(f_i \epsilon)$$

$$475 \quad \text{with } m_{j,k}^i(t) = \begin{cases} e^{\lambda_r^i t} & \text{if } j = k = i \\ e^{\lambda_s^i t} & \text{if } j = k = i' \\ e^{\lambda_0^i t} & \text{if } j = k \notin \{i, i'\} \\ \frac{g_0^i g_s^i e^{\lambda_0^i t} (e^{\lambda_r^i t} - 1) (1 - e^{-(\lambda_0^i - \lambda_s^i)t})}{\lambda_r^i (\lambda_0^i - \lambda_s^i)} & \text{if } j = i \text{ and } k = i' \\ \frac{g_0^i e^{\lambda_0^i t} (e^{\lambda_r^i t} - 1)}{\lambda_r^i} & \text{if } j = i \text{ and } k \notin \{i, i'\} \\ \frac{g_0^i (e^{\lambda_0^i t} - e^{\lambda_s^i t})}{\lambda_0^i - \lambda_s^i} & \text{if } k = i' \text{ and } j \notin \{i, i'\} \\ 0 & \text{otherwise} \end{cases} .$$

476

477

478 **Proposition A.1.** Under the therapy with Drug  $i$ :

479

$$\mathcal{R}'(t) = \mathcal{D}_i \mathcal{R}(t), \quad \mathcal{R}(t_0 + \Delta t) = \mathcal{M}_i(\Delta t) \mathcal{R}(t_0).$$

480

**Proposition A.2.**  $\mathcal{L}_{i,\epsilon}|_{\epsilon=0} = I_N$  for all  $1 \leq i \leq N$ .

481

**Proposition A.3.**  $\frac{d}{d\epsilon} \mathcal{L}_{i,\epsilon}|_{\epsilon=0} = f_i \mathcal{D}_i$ , for all  $1 \leq i \leq N$

482

**Lemma A.4.**  $\frac{d}{d\epsilon} \left( \prod_{k=i}^1 \mathcal{L}_{k,\epsilon} \right) = \sum_{k=1}^i f_k \mathcal{D}_k$  for all  $1 \leq i \leq N$

*Proof.*

$$\begin{aligned} \frac{d}{d\epsilon} \left( \prod_{k=i}^1 \mathcal{L}_{k,\epsilon} \right) &= \sum_{k=1}^i \left( \prod_{j=i}^{k-1} \mathcal{L}_{j,\epsilon} \right) \left( \frac{d}{d\epsilon} \mathcal{L}_{k,\epsilon} \right) \left( \prod_{j=k+1}^1 \mathcal{L}_{j,\epsilon} \right) \\ &= \sum_{k=1}^i \left( \prod_{j=i}^{k-1} I_N \right) (f_k \mathcal{D}_k) \left( \prod_{j=k+1}^1 I_N \right) \quad (\text{by Propositions A.2 - A.3}) \\ &= \sum_{k=1}^i f_k \mathcal{D}_k \end{aligned}$$

483

□

**Lemma A.5.** For any positive integer,  $n$ , and an any integer,  $i$ , in  $[1, N]$

$$\begin{aligned} &\lim_{\epsilon \rightarrow 0} \frac{\mathcal{L}_{i,\eta\epsilon} \left( \prod_{k=i-1}^1 \mathcal{L}_{k,\epsilon} \right) \left( \prod_{k=N}^1 \mathcal{L}_{k,\epsilon} \right)^n - I_N}{(n + \sum_{k=1}^{i-1} f_k + \eta f_i) \epsilon} \\ &= \frac{1}{n + \sum_{k=1}^{i-1} f_k + \eta f_i} \left( n \sum_{k=1}^N f_k \mathcal{D}_k + \sum_{k=1}^{i-1} f_k \mathcal{D}_k + \eta f_i \mathcal{D}_i \right), \end{aligned}$$

484 where  $\eta$  is some number in  $[0, 1)$  and  $0 \leq f_k \leq 1$  with  $\sum_{k=1}^N f_k = 1$ .

*Proof.*

$$\begin{aligned}
 & \lim_{\epsilon \rightarrow 0} \frac{\mathcal{L}_{i,\eta\epsilon} \left( \prod_{k=i-1}^1 \mathcal{L}_{k,\epsilon} \right) \left( \prod_{k=N}^1 \mathcal{L}_{k,\epsilon} \right)^n - I_N}{(n + \sum_{k=1}^{i-1} f_k + \eta f_i) \epsilon} \\
 &= \lim_{\epsilon \rightarrow 0} \frac{\frac{d}{d\epsilon} \left( \mathcal{L}_{i,\eta\epsilon} \left( \prod_{k=i-1}^1 \mathcal{L}_{k,\epsilon} \right) \left( \prod_{k=N}^1 \mathcal{L}_{k,\epsilon} \right)^n - I_N \right)}{\frac{d}{d\epsilon} (n + \sum_{k=1}^{i-1} f_k + \eta f_i) \epsilon} \quad (\text{by L'Hospital's Rule}) \\
 &= \lim_{\epsilon \rightarrow 0} \frac{\mathcal{L}_{i,\eta\epsilon} \left( \prod_{k=i-1}^1 \mathcal{L}_{k,\epsilon} \right) \frac{d}{d\epsilon} \left( \prod_{k=N}^1 \mathcal{L}_{k,\epsilon} \right)^n + \mathcal{L}_{i,\eta\epsilon} \frac{d}{d\epsilon} \left( \prod_{k=i-1}^1 \mathcal{L}_{k,\epsilon} \right) \left( \prod_{k=N}^1 \mathcal{L}_{k,\epsilon} \right)^n + \dots}{n + \sum_{k=1}^{i-1} f_k + \eta f_i} \\
 & \quad \dots + \frac{d}{d\epsilon} \left( \mathcal{L}_{i,\eta\epsilon} \right) \left( \prod_{k=i-1}^1 \mathcal{L}_{k,\epsilon} \right) \left( \prod_{k=N}^1 \mathcal{L}_{k,\epsilon} \right)^n \\
 &= \lim_{\epsilon \rightarrow 0} \frac{n \sum_{k=1}^N f_k \mathcal{D}_k + \sum_{k=1}^{i-1} f_k \mathcal{D}_k + \eta f_i \mathcal{D}_{i+1}}{n + \sum_{k=1}^{i-1} f_k + \eta f_i} \quad (\text{by Proposition A.2-A.3 and Lemma A.4}) \\
 &= \frac{1}{n + \sum_{k=1}^{i-1} f_k + \eta f_i} \left( n \sum_{k=1}^N f_k \mathcal{D}_k + \sum_{k=1}^{i-1} f_k \mathcal{D}_k + \eta f_i \mathcal{D}_i \right)
 \end{aligned}$$

485

□

486 **Theorem A.6.** If Drug1, Drug2, ..., DrugN, are prescribed in a cycle, and are switched instan-  
 487 taneously with relative duration of  $0 \leq f_1, f_2, \dots, f_N \leq 1$  (where  $\sum_{k=1}^N f_k = 1$ ), respectively,  $\mathcal{R}$   
 488 obeys

$$489 \quad \frac{d\mathcal{R}}{dt} = \sum_{k=1}^N f_k \mathcal{D}_k \mathcal{R}$$

490 *Proof.* For any time point  $t_0$ , let us define  $\mathcal{R}_\epsilon(t)$  as a vector-valued function of  $R_1(t), R_2(t), \dots,$   
 491 and  $R_N(t)$  describing the cell population dynamics under a periodic therapy starting at  $t_0$   
 492 with Drug  $i$  assigned for  $t_0 + (m + \sum_{k=1}^{i-1} f_k) \epsilon \leq t < t_0 + (m + \sum_{k=1}^i f_k) \epsilon$  where  $m$  is any  
 493 non-negative integer and  $i$  is any integer in  $[1, N]$ .

494

For any  $\Delta t > 0$ , there uniquely exist  $n \in \{0, 1, 2, \dots\}$  and  $\eta \in [0, 1)$  such that  $\Delta t = (n + \sum_{k=1}^{i-1} f_k + \eta f_i) \epsilon$ . Then, by Proposition A.1 and the definitions of  $\mathcal{L}_i$ s,

$$\mathcal{R}_\epsilon(t) = \mathcal{R}_\epsilon \left( t_0 + \left( n + \sum_{k=1}^{i-1} f_k + \eta f_i \right) \epsilon \right) = \eta f_i \mathcal{L}_i \left( \prod_{k=i-1}^1 f_k \mathcal{L}_{k,\epsilon} \right) \left( \prod_{k=N}^1 f_k \mathcal{L}_{k,\epsilon} \right)^n \mathcal{R}(t_0) \dots (*1)$$

where  $\mathcal{R}(t_0) = \left( R_1(t_0) \ R_2(t_0) \ \cdots \ R_N(t_0) \right)^T$ . And,  $\mathcal{R}_0(t)$  represents instantaneous drug switching.

$$\begin{aligned}
 \left. \frac{d}{dt} \mathcal{R}_0 \right|_{t=t_0} &= \lim_{\Delta t \rightarrow 0} \frac{\mathcal{R}_0(t_0 + \Delta t) - \mathcal{R}(t_0)}{\Delta t} \\
 &= \lim_{\Delta t \rightarrow 0} \lim_{\epsilon \rightarrow 0} \frac{\mathcal{R}_\epsilon \left( t_0 + \left( n(\Delta t, \epsilon) + \sum_{k=1}^{i-1} f_k + \eta(\Delta t, \epsilon) f_i \right) \epsilon \right) - \mathcal{R}(t_0)}{\left( n(\Delta t, \epsilon) + \sum_{k=1}^{i-1} f_k + \eta(\Delta t, \epsilon) f_i \right) \epsilon} \\
 &= \lim_{\Delta t \rightarrow 0} \lim_{\epsilon \rightarrow 0} \frac{\eta(\Delta t, \epsilon) \mathcal{L}_{i,\epsilon} \left( \prod_{k=i-1}^1 \mathcal{L}_{k,\epsilon} \right) \left( \prod_{k=N}^1 \mathcal{L}_{k,\epsilon} \right)^{n(\Delta t, \epsilon)} - I_N}{\left( n(\Delta t, \epsilon) + \sum_{k=1}^{i-1} f_k + \eta(\Delta t, \epsilon) f_i \right) \epsilon} \mathcal{R}(t_0) \\
 &= \lim_{\Delta t \rightarrow 0} \lim_{\epsilon \rightarrow 0} \frac{1}{n + \sum_{k=1}^{i-1} f_k + \eta f_i} \left( n \sum_{k=1}^N f_k \mathcal{D}_k + \sum_{k=1}^{i-1} f_k \mathcal{D}_k + \eta f_i \mathcal{D}_i \right) \mathcal{R}(t_0) \quad (\text{by Lemma A.5}) \\
 &= \lim_{\Delta t \rightarrow 0} \lim_{n \rightarrow \infty} \frac{1}{n + \sum_{k=1}^{i-1} f_k + \eta f_i} \left( n \sum_{k=1}^N f_k \mathcal{D}_k + \sum_{k=1}^{i-1} f_k \mathcal{D}_k + \eta f_i \mathcal{D}_i \right) \mathcal{R}(t_0) \\
 &= \sum_{k=1}^N f_k \mathcal{D}_k \mathcal{R}(t_0).
 \end{aligned}$$

495 Therefore,

$$496 \quad \left. \frac{d}{dt} \mathcal{R}_0 \right|_{t=t_0} = \sum_{k=1}^N f_k \mathcal{D}_k \mathcal{R}(t_0) \quad \text{and} \quad \frac{d\mathcal{R}}{dt} = \sum_{k=1}^N f_k \mathcal{D}_k \mathcal{R}.$$

497

□

498 **Theorem A.7.** *The population makeup at which all the drugs are equally effective is*

$$499 \quad \mathcal{R}^* = \frac{\mathcal{C}}{\|\mathcal{C}\|_1} \quad \text{where} \quad \mathcal{C} = \begin{pmatrix} (\mathcal{P}^1)^T \\ (\mathcal{P}^2)^T \\ \vdots \\ (\mathcal{P}^N)^T \end{pmatrix}^{-1} \mathbf{1},$$

500 where  $\{\mathcal{P}^1, \mathcal{P}^2, \dots, \mathcal{P}^N\}$  is linearly independent.

501 *Proof.* By the definition (4), the effect of Drug  $i$  is

$$502 \quad ef_k = \mathcal{P}^i \cdot \mathcal{R} = (\mathcal{P}^i)^T \mathcal{R}.$$

503 Then, at a specific population makeup with balanced drug effects, denoted by  $\mathcal{R}^*$ ,

$$504 \quad (\mathcal{P}^1)^T \mathcal{R}^* = (\mathcal{P}^2)^T \mathcal{R}^* = \dots = (\mathcal{P}^N)^T \mathcal{R}^* := k \iff \begin{pmatrix} (\mathcal{P}^1)^T \\ (\mathcal{P}^2)^T \\ \vdots \\ (\mathcal{P}^N)^T \end{pmatrix} \mathcal{R}^* = k \begin{pmatrix} 1 \\ \vdots \\ 1 \end{pmatrix}$$

505 where  $k$  is a constant representing the level of balanced drug effect. Since  $\{\mathcal{P}^1, \mathcal{P}^2, \dots, \mathcal{P}^N\}$   
 506 is linearly independent, we can isolate  $\mathcal{R}^*$  with an inverse matrix.

$$507 \quad \mathcal{R}^* = k \begin{pmatrix} (\mathcal{P}^1)^T \\ (\mathcal{P}^2)^T \\ \vdots \\ (\mathcal{P}^N)^T \end{pmatrix}^{-1} \mathbf{1},$$

508 Also,  $\|\mathcal{R}^*\|_1 = 1$ , therefore

$$509 \quad k = \frac{1}{\|\mathcal{C}\|_1} \quad \text{where} \quad \mathcal{C} = \begin{pmatrix} (\mathcal{P}^1)^T \\ (\mathcal{P}^2)^T \\ \vdots \\ (\mathcal{P}^N)^T \end{pmatrix}^{-1} \mathbf{1}$$

510 and

$$511 \quad \mathcal{R}^* = \frac{\mathcal{C}}{\|\mathcal{C}\|_1}$$

512 □

513 **Corollary A.8.** *When the drugs are symmetric, the population makeup at which all the drugs are*  
 514 *equally effective is*

$$515 \quad \mathcal{R}^* = \frac{1}{N} \mathbf{1},$$

516 where  $\{\mathcal{P}^1, \mathcal{P}^2, \dots, \mathcal{P}^N\}$  is linearly independent.

517 *Proof.* Similar to the proof of Theorem A.7, there exists unique solution of  $\mathcal{R}^*$  and  $k$  satisfy-  
 518 ing

$$519 \quad \begin{pmatrix} (\mathcal{P}^1)^T \\ (\mathcal{P}^2)^T \\ \vdots \\ (\mathcal{P}^N)^T \end{pmatrix} \mathcal{R}^* = k \mathbf{1} \quad \text{and} \quad \|\mathcal{R}^*\|_1 = 1.$$



If we plug in  $\mathcal{R}^* = \frac{1}{N} \mathbb{1}$  to the equation,

$$\begin{aligned} \begin{pmatrix} (\mathcal{P}^1)^T \\ (\mathcal{P}^2)^T \\ \vdots \\ (\mathcal{P}^N)^T \end{pmatrix} \mathcal{R}^* &= \frac{1}{N} \begin{pmatrix} (\mathcal{P}^1)^T \\ (\mathcal{P}^2)^T \\ \vdots \\ (\mathcal{P}^N)^T \end{pmatrix} \mathbb{1} = \frac{1}{N} \begin{pmatrix} p_r + p_s + (N-2)p_0 \\ \vdots \\ p_r + p_s + (N-2)p_0 \end{pmatrix} \\ &= \frac{p_r + p_s + (N-2)p_0}{N} \mathbb{1} = k \mathbb{1} \quad \text{with} \quad k = \frac{p_r + p_s + (N-2)p_0}{N}. \end{aligned}$$

520 Therefore, proved. □

521 **Theorem A.9.**  $\{\mathcal{P}^1, \mathcal{P}^2, \dots, \mathcal{P}^N\}$  is linearly dependent, if the drugs are symmetric (i.e.,  $\{p_r^i, p_s^i, p_0^i\} =$   
522  $\{p_r, p_s, p_0\}$  for all  $i$ ) and  $p_r + p_s + (N-2)p_0 = 0$

523 *Proof.* It suffices to show that there exists a linear combination of  $\mathcal{P}^i$ s that equals to a zero  
524 vector. Let the general form of a linear combination be  $\sum_{i=1}^N a_i \mathcal{P}^i$ , where  $a_i$ s are constants. If  
525  $a_i = 1$  for all  $i$ ,  $\sum_{i=1}^N \mathcal{P}^i = (p_r + p_s + (N-2)p_0)\mathbb{1} = 0 \cdot \mathbb{1} = 0$ . Therefore,  $\{\mathcal{P}^1, \mathcal{P}^2, \dots, \mathcal{P}^N\}$  is  
526 linearly dependent. □

527 **Theorem A.10.** Under instantaneously switching of symmetric drug cycle, total population with  
528 equal drug duration ( $f_1 = f_2 = \dots = f_N = 1/N$ ), TP, is changing exponentially with the  
529 growth/decay rate,

$$530 \quad \lambda = \frac{p_r + p_s + (N-2)p_0}{N}.$$

*Proof.* The derivative of total population, TPD, is the summation of the vector,  $\frac{d\mathcal{R}}{dt}$ .

$$\begin{aligned} TPD &= \text{sum} \left( \frac{d\mathcal{R}}{dt} \right) = \text{sum} \left( \frac{1}{N} \sum_{k=1}^N \mathcal{D}_k \mathcal{R} \right) \quad (\text{by Theorem A.6}) \\ &= \frac{1}{N} \sum_{k=1}^N (\text{sum}(\mathcal{D}_k \mathcal{R})) = \frac{1}{N} \sum_{k=1}^N (\mathcal{P}^k \cdot \mathcal{R}) = \frac{1}{N} \left( \sum_{k=1}^N \mathcal{P}^k \right) \cdot \mathcal{R} \\ &= \frac{1}{N} \begin{pmatrix} p_r + p_s + (N-2)p_0 \\ \vdots \\ p_r + p_s + (N-2)p_0 \end{pmatrix} \cdot \mathcal{R} = \frac{p_r + p_s + (N-2)p_0}{N} (\mathbb{1} \cdot \mathcal{R}) \\ &= \frac{p_r + p_s + (N-2)p_0}{N} \sum_{k=1}^N R_k = \lambda TP \end{aligned}$$

531 □
